# Supplementary material for: miR-29a-3p/THBS2 Axis Regulates PAH-Induced Cardiac Fibrosis
Source: MDPI journal article supplement (doi:10.3390/ijms221910574), 2021-09-30
Supplement: s1 [file s1]

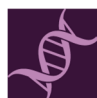

# miR-29a-3p/THBS2 axis regulates PAH-induced cardiac fibrosis

## Supplementary Materials:

Table S1. Clinical characteristics of IPAH patients.

| Diagnosis | Clinical Characteristics |     |         |     |    | Echocardiography |         |        |        |        |       | Right Heart Catheterization |        |        |         |       |
|-----------|--------------------------|-----|---------|-----|----|------------------|---------|--------|--------|--------|-------|-----------------------------|--------|--------|---------|-------|
|           |                          |     |         |     |    | RA/RV            | D-shape | EF (%) | RV'S   | PA     | TAPSE | RA                          | m PAP  | PCWP   | C.O     | PVR   |
|           | Number                   | Sex | Age (y) | H/T | DM | Dilated          | LV      |        | (cm/s) | (mmHg) |       | (mmHg)                      | (mmHg) | (mmHg) | (L/min) | (WU)  |
| IPAH      | 1                        | M   | 84      | Y   | N  | RV               | N       | 77.2   | 17.6   | 61     | 2.52  | 4                           | 20     | 14     | 5.41    | 1.1   |
|           | 2                        | F   | 49      | N   | N  | RA/RV            | Y       | 71.5   | 9.16   | 76     | 0.96  | 3                           | 49     | 3      | 3.5     | 13.14 |
|           | 3                        | F   | 55      | N   | N  | RA/RV            | Y       | 79.3   | 12.6   | 189    | 1.95  | 15                          | 61     | 17     | 3.48    | 12.06 |
|           | 4                        | M   | 37      | N   | N  | RA/RV            | Y       | 75.7   | 10     | 57     | 1.3   | 9                           | 47     | 10     | 5.48    | 6.75  |
|           | 5                        | F   | 52      | N   | N  | RA/RV            | Y       | 78.5   | 9.36   | 177    | 1.22  | 14                          | 53     | 21     | 3.3     | 9.69  |
|           | 6                        | F   | 28      | N   | N  | RV               | Y       | 64.1   | 11     | 72     | 1.65  | 8                           | 55     | 10     | 9.73    | 3.49  |
|           | 7                        | F   | 36      | N   | N  | RA/RV            | Y       | 77.8   | 10.1   | 79     | 1.65  | 6                           | 45     | 10     | 4.48    | 7.8   |
|           | 8                        | F   | 36      | N   | N  | RA/RV            | Y       | 65.3   | 11.5   | 87     | 2.22  | 9                           | 42     | 11     | 4.57    | 6.78  |
|           | 9                        | F   | 40      | N   | N  | RA/RV            | Y       | 62.4   | 12.8   | 36     | 1.88  | 7                           | 40     | 11     | 7.25    | 4     |
|           | 10                       | F   | 40      | N   | N  | RA/RV            | Y       | 72.9   | 11.5   | 44     | 1.95  | 10                          | 45     | 13     | 7.33    | 4.1   |
|           | 11                       | M   | 56      | N   | N  | RA/RV            | Y       | 78.5   | 14.2   | 64     | 1.7   | 12                          | 56     | 14     | 7.27    | 5.7   |
|           | 12                       | F   | 76      | Y   | Y  | Mild RA          | N       | 69.3   | 12.1   | 101    | 2.02  | 8                           | 53     | 14     | 4.5     | 7.55  |
|           | 13                       | F   | 32      | N   | N  | RA/RV            | Y       | 63.2   | 11.5   | 103    | 1.37  | 6                           | 70     | 12     | 3.37    | 17.2  |
|           | 14                       | M   | 32      | N   | N  | RA/RV            | Y       | 71.5   | 15.2   | 118    | 1.81  | 19                          | 62     | 13     | 3.58    | 13.6  |
|           | 15                       | F   | 34      | N   | N  | N                | N       | 73.8   | 11.7   | 57     | 1.79  | 12                          | 20     | 12     | 5.09    | 1.57  |
|           | 16                       | F   | 50      | N   | N  | RV               | Y       | 82.49  | 15.5   | 83     | 2.85  | 12                          | 44     | 15     | 6.46    | 4.49  |
|           | 17                       | F   | 48      | N   | N  | RA/RV            | Y       | 73.2   | 9.46   | 96     | 1.75  | 8                           | 50     | 12     | 2.84    | 13.3  |
|           | 18                       | F   | 73      | N   | Y  | Mild RV          | N       | 69.9   | 11.2   | 61     | 1.56  | 13                          | 73     | 15     | 5.33    | 10.8  |
|           | 19                       | F   | 72      | N   | Y  | LA/RA/RV         | Y       | 71.28  | 10.7   | 112    | 1.52  | 10                          | 48     | 9      | 2.65    | 14.7  |
|           | 20                       | M   | 52      | N   | Y  | RA/RV            | N       | 75.8   | 16.4   | 60     | 1.97  | 7                           | 28     | 14     | 8.57    | 1.63  |
|           | 21                       | F   | 60      | Y   | N  | RA/RV            | Y       | 79     | 12     | 77     | 1.89  | 20                          | 57     | 14     | 4.52    | 9.51  |

Abbreviations: H/T, hypertension; DM, diabetes; RA, right atrial; RV, ventricular; PA, estimated systolic pulmonary pressure; TAPSE, tricuspid annular plane systolic excursion; EF, ejection fraction; RV-S', longitudinal velocity of the tricuspid annulus (measure by tissue Doppler); mPAP, mean pulmonary artery pressure; PVR, pulmonary vascular resistance; C.O, cardiac output; PCWP, pulmonary capillary wedge pressure; D-shape LV, D-shaped left ventricle (Flattening of the interventricular septum detected during echocardiographic examination is called D-shaped left ventricle)

**Table S2. Clinical characteristics of healthy donors.**

| Clinical characteristics |     |         |     |    | Echocardiography |              |           |
|--------------------------|-----|---------|-----|----|------------------|--------------|-----------|
| Number                   | Sex | Age (y) | H/T | DM | EF (%)           | RV-S' (cm/s) | PA (mmHg) |
| 1                        | F   | 30      | N   | N  | 69.6             | N/A          | 27        |
| 2                        | M   | 44      | N   | N  | 56.2             | N/A          | <20       |
| 3                        | F   | 32      | N   | N  | 78               | N/A          | 33        |
| 4                        | M   | 43      | N   | N  | 66.8             | N/A          | <20       |
| 5                        | F   | 37      | N   | N  | 80.5             | N/A          | <20       |
| 6                        | M   | 38      | N   | N  | 59.5             | N/A          | <20       |
| 7                        | M   | 27      | N   | N  | 70.7             | N/A          | 24        |
| 8                        | M   | 38      | N   | N  | 71.9             | N/A          | 28        |
| 9                        | F   | 22      | N   | N  | 53               | N/A          | 25        |
| 10                       | F   | 33      | N   | N  | 75.4             | N/A          | <20       |
| 11                       | F   | 36      | N   | N  | 70.6             | N/A          | <20       |
| 12                       | F   | 44      | N   | N  | 53.9             | N/A          | <20       |
| 13                       | F   | 37      | N   | N  | 64.8             | N/A          | 28        |
| 14                       | F   | 45      | N   | N  | 71.9             | N/A          | <20       |
| 15                       | M   | 25      | N   | N  | 73               | N/A          | <20       |
| 16                       | M   | 34      | N   | N  | 70.4             | N/A          | 28        |
| 17                       | F   | 31      | N   | N  | 65               | N/A          | 26        |
| 18                       | F   | 45      | N   | N  | 63               | N/A          | 22        |
| 19                       | M   | 29      | N   | N  | 68.2             | N/A          | 26        |
| 20                       | F   | 38      | N   | N  | 73.8             | N/A          | 28        |
| 21                       | M   | 44      | N   | N  | 58.6             | N/A          | 29        |

Abbreviations: H/T, hypertension; DM, diabetes; EF, ejection fraction; RV-S', longitudinal velocity of the tricuspid annulus (measure by tissue Doppler); PA, estimated systolic pulmonary pressure.

**Table S3. Primer and probe sequences.**

| Assay Name                                   | 5'<br>labeled | Sequence (5'–3')                                       | 3'<br>labeled |
|----------------------------------------------|---------------|--------------------------------------------------------|---------------|
| hsa-miR-29a-3p reverse<br>transcribed primer |               | GTCGTATCCAGTGCAGGGTCCGAGGTATTCGCACTG<br>GATACGACTAACCG |               |
| hsa-miR-29a-3p-F                             | ----          | CGCGTAGCACCATCTGAAAT                                   | ----          |
| hsa-miR-29a-3p-R                             | ----          | AGTGCAGGGTCCGAGGTATT                                   | ----          |
| hsa-miR-29a-3p-P                             | FAM           | ACTAACCGATTTCAG                                        | MGB           |
| cel-miR-29a-3p reverse<br>transcribed primer |               | GTCGTATCCAGTGCAGGGTCCGAGGTATTCGCACTG<br>GATACGACCAAGCT |               |
| cel-miR-39-3p-F                              | ----          | CGCGTCACCGGGTGTAAG                                     | ----          |
| cel-miR-39-3p-R                              | ----          | AGTGCAGGGTCCGAGGTATT                                   | ----          |
| cel-miR-39-3p-P                              | FAM           | ACGACCAAGCTGATTACAC                                    | MGB           |

FAM, 6-carboxyfluorescein; MGB, minor groove binder
